# Supplementary material for: Phytochemical Screening and Antioxidant Activity of Selected Estonian Galium Species
Source: MDPI journal article supplement (doi:10.3390/molecules28062867), 2023-03-22
Supplement: s1 [file s1]

# Phytochemical Screening and Antioxidant Activity of Selected Estonian *Galium* Species

Pille-Riin Laanet <sup>1,\*</sup>, Piret Saar-Reismaa<sup>1,2</sup>, Piia Jõul<sup>1</sup>, Olga Bragina<sup>1,3</sup> and Merike Vaher<sup>1</sup>

<sup>1</sup> Department of Chemistry and Biotechnology, Tallinn University of Technology, Akadeemia tee 15, 12618 Tallinn, Estonia

<sup>2</sup> HAN BioCentre, Laan van Scheut 2, 6525 EM Nijmegen, the Netherlands

<sup>3</sup> National Institute for Health Development, Hiiu 42, 11619 Tallinn, Estonia

\* Correspondence: pille-riin.laanet@taltech.ee; Tel.: +372 620 4325

## Supplementary Materials

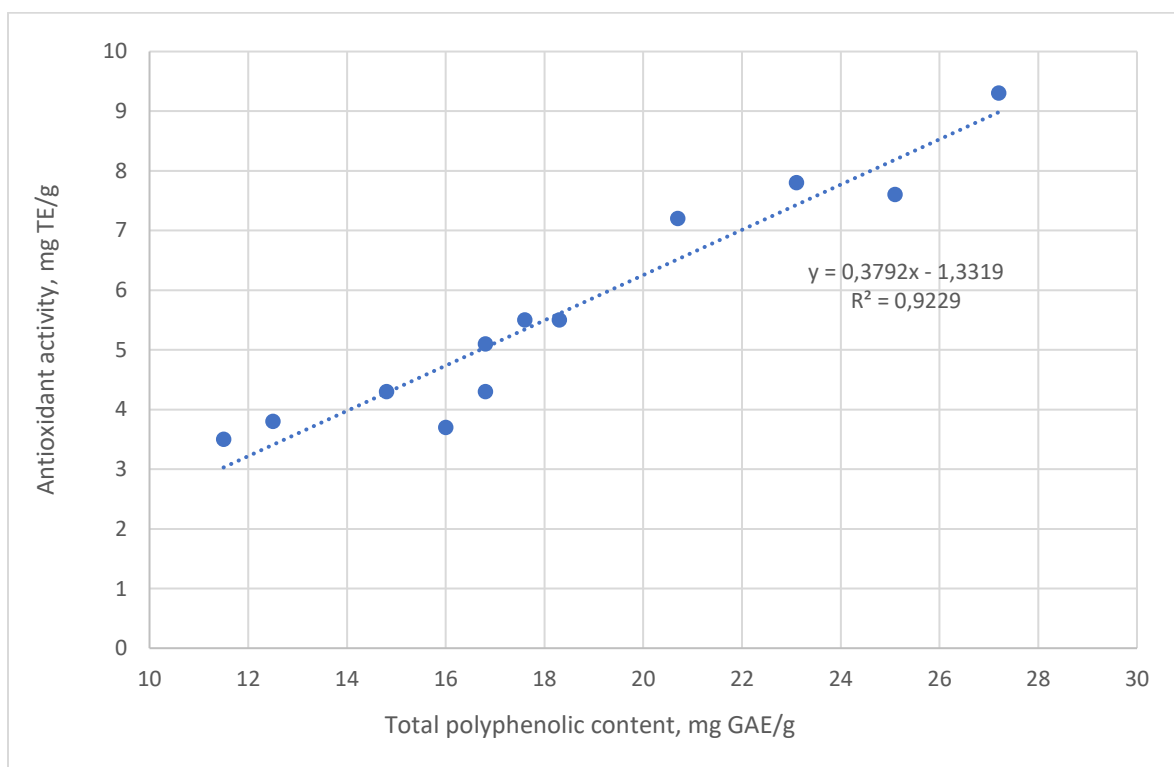

Figure S1. The correlation of phenolic content and antioxidant properties of the *Galium* extracts

Figures S2–S29. UV spectra of all quantified compounds, measured from the analyses of 50% ethanol extracts in the range of 200 to 400 nm (compound numeration as per Tables 2 and 3):

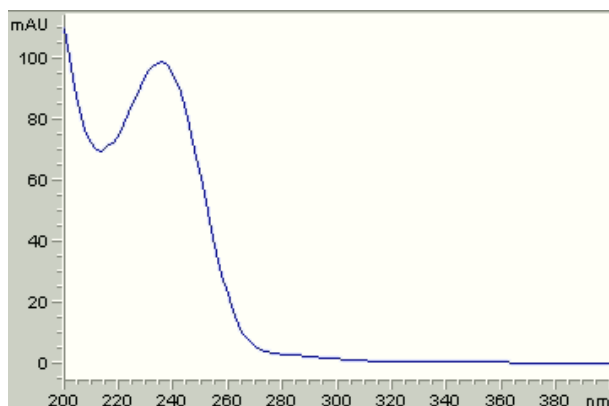

Figure S2. UV spectrum of compound 1  
(quantified using **asperuloside calibration**)

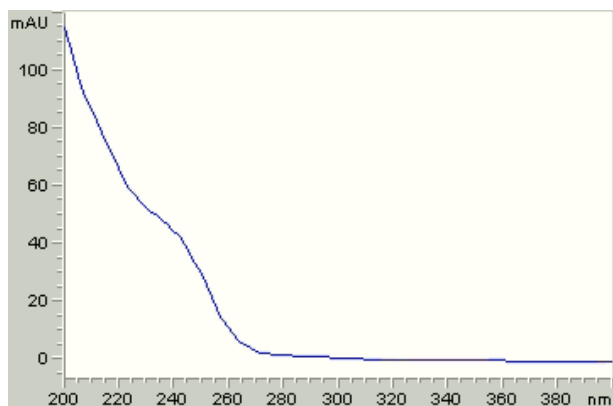

Figure S3. UV spectrum of compound 2  
(quantified using **asperuloside calibration**)

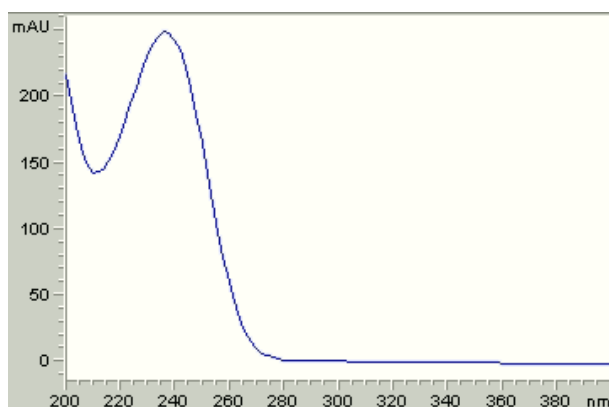

Figure S4. UV spectrum of compound 3  
(quantified using **asperuloside calibration**)

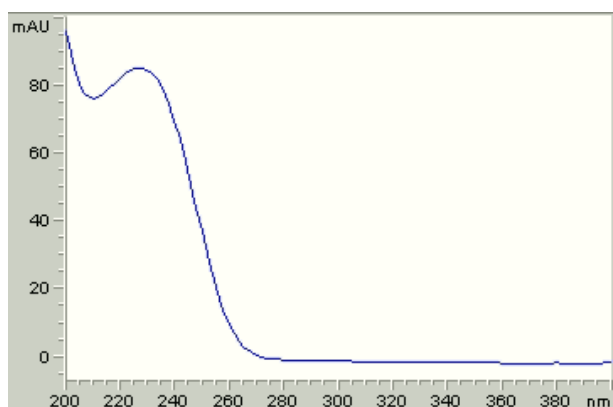

Figure S5. UV spectrum of compound 4  
(quantified using **asperuloside calibration**)

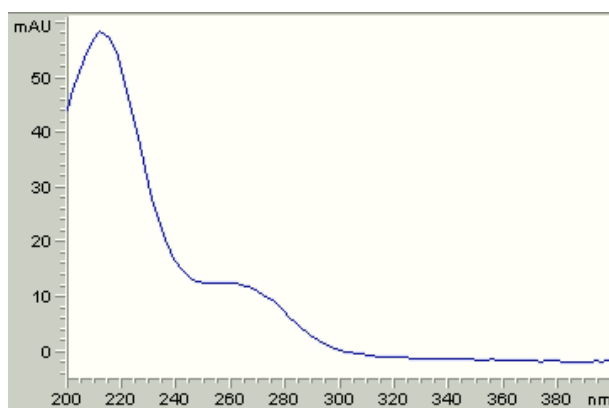

Figure S6. UV spectrum of compound 5  
(quantified using **asperuloside calibration**)

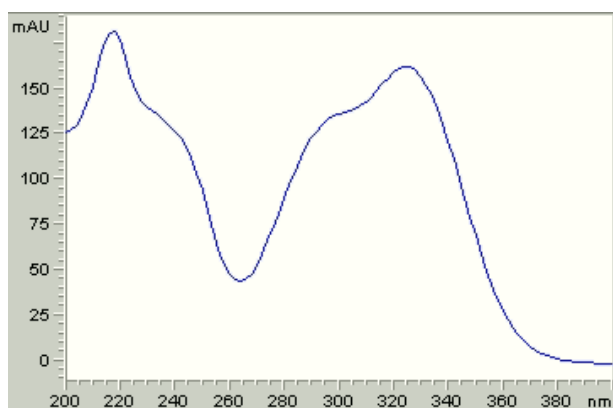

Figure S7. UV spectrum of compound 6  
(identified as **neochlorogenic acid** using a  
standard compound)

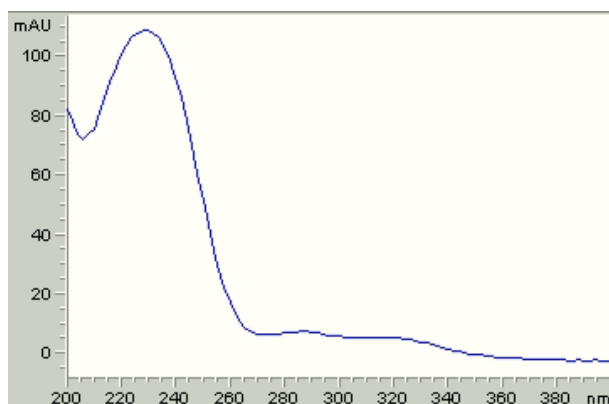

Figure S8. UV spectrum of compound **7**  
(quantified using **asperuloside** calibration)

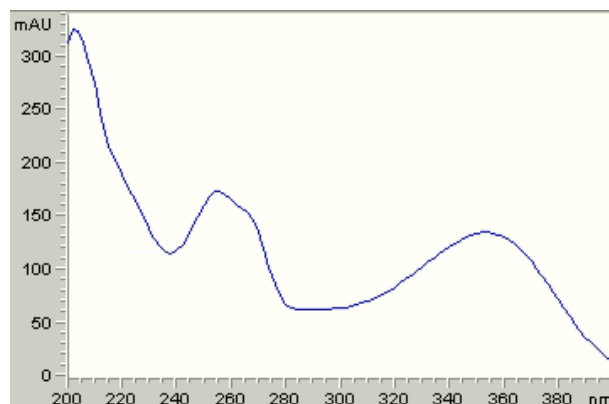

Figure S9. UV spectrum of compound **8**  
(quantified using **rutin** calibration)

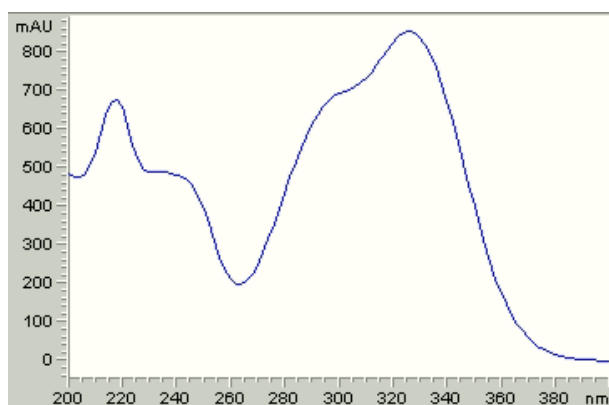

Figure S10. UV spectrum of compound **9**  
(identified as **chlorogenic acid** using a  
standard compound)

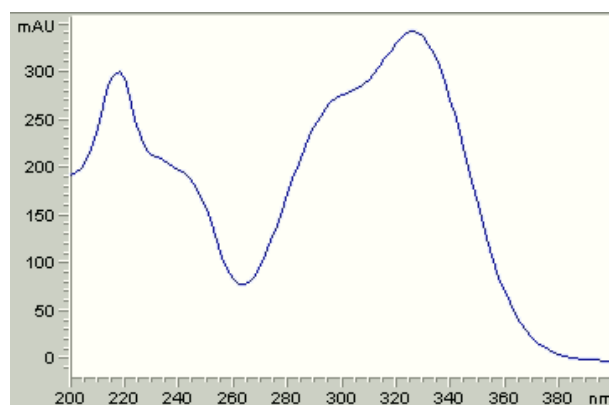

Figure S11. UV spectrum of compound **10**  
(quantified using **neochlorogenic acid**  
calibration)

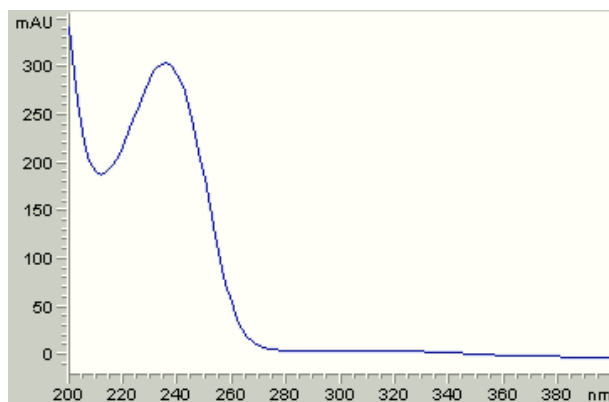

Figure S12. UV spectrum of compound **11**  
(identified as **asperuloside** using a standard  
compound)

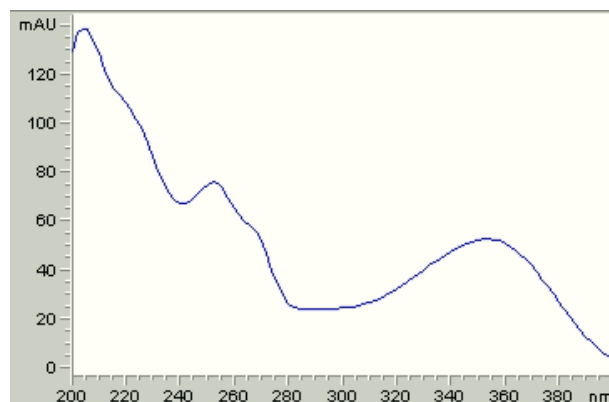

Figure S13. UV spectrum of compound **12**  
(quantified using **rutin** calibration)

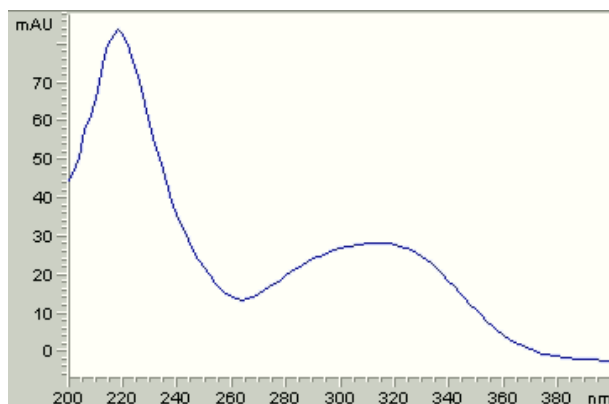

Figure S14. UV spectrum of compound **13**  
(quantified using **asperuloside** calibration)

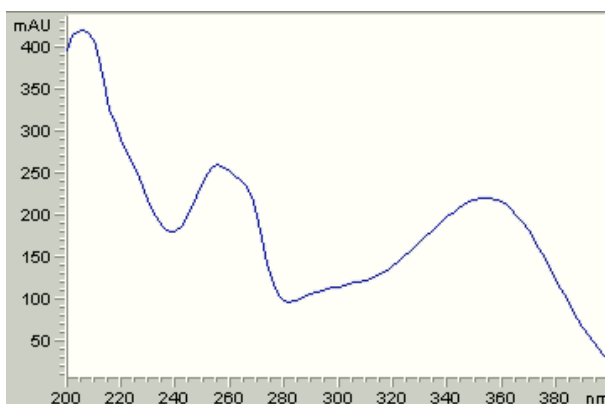

Figure S15. UV spectrum of compound **14**  
(identified as **rutin** using a standard compound)

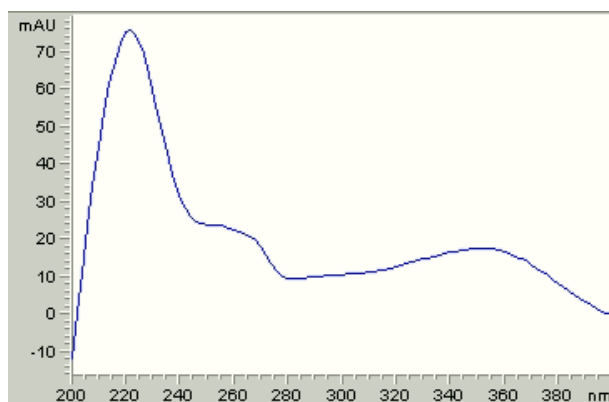

Figure S16. UV spectrum of compound **15**  
(quantified using **rutin** calibration)

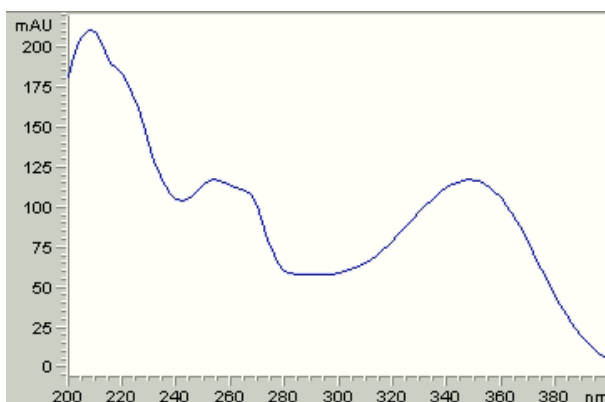

Figure S17. UV spectrum of compound **16**  
(quantified using **rutin** calibration)

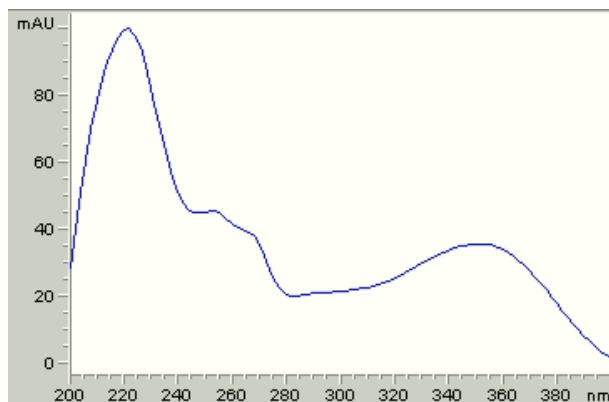

Figure S18. UV spectrum of compound **17**  
(quantified using **rutin** calibration)

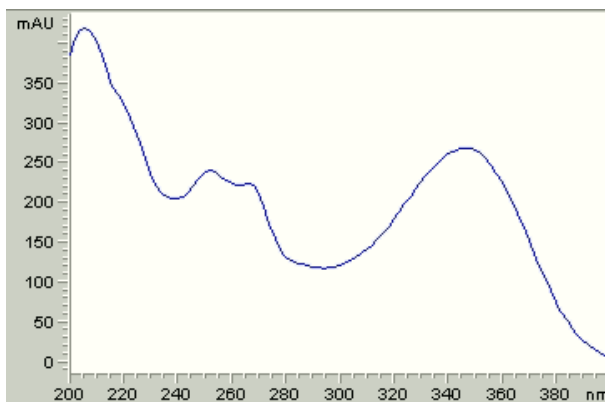

Figure S19. UV spectrum of compound **18**  
(quantified using **rutin** calibration)

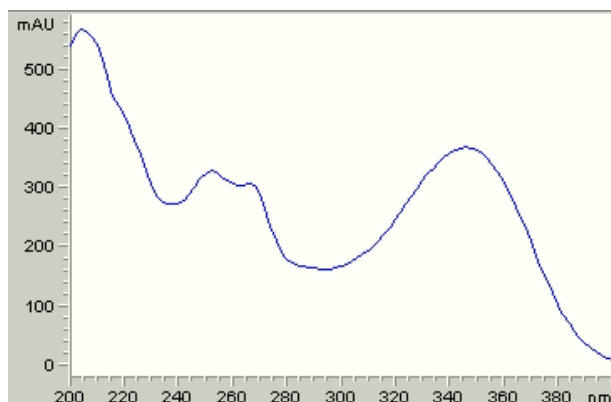

Figure S20. UV spectrum of compound **19**  
(quantified using **rutin calibration**)

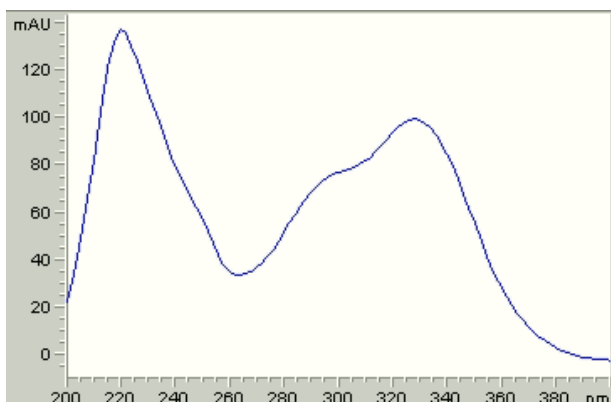

Figure S21. UV spectrum of compound **20**  
(quantified using **neochlorogenic acid calibration**)

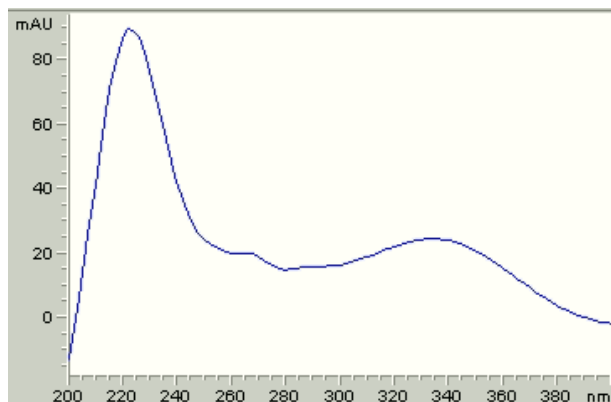

Figure S22. UV spectrum of compound **21**  
(quantified using **rutin calibration**)

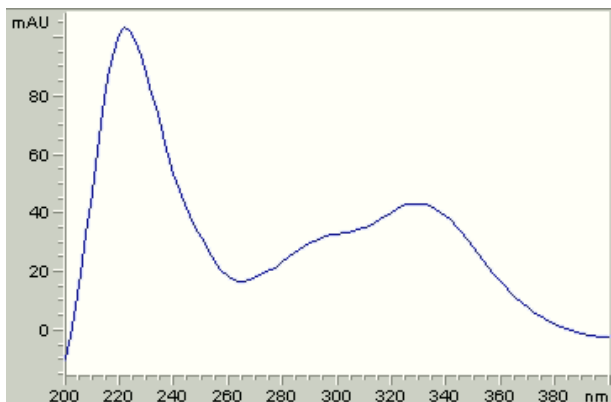

Figure S23. UV spectrum of compound **22**  
(quantified using **neochlorogenic acid calibration**)

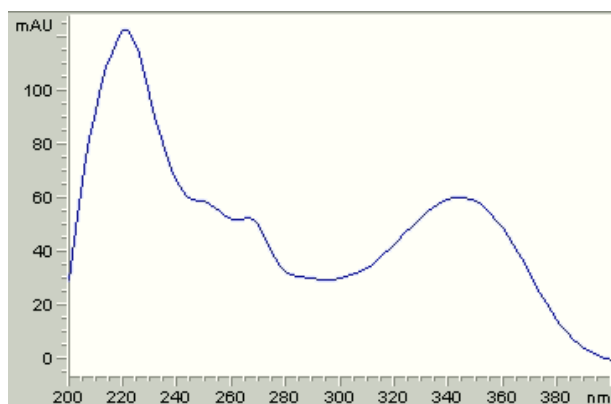

Figure S24. UV spectrum of compound **23**  
(quantified using **rutin calibration**)

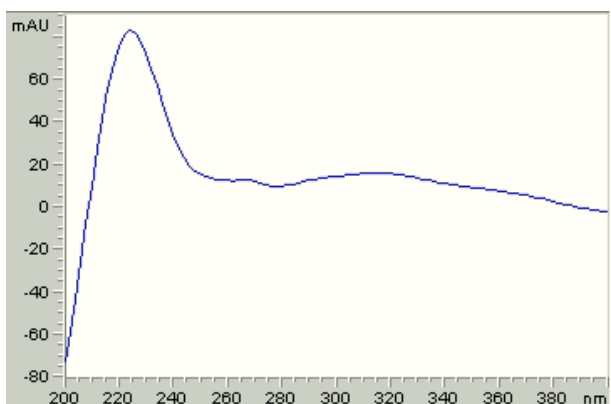

Figure S25. UV spectrum of compound **24**  
(quantified using **quercetin calibration**)

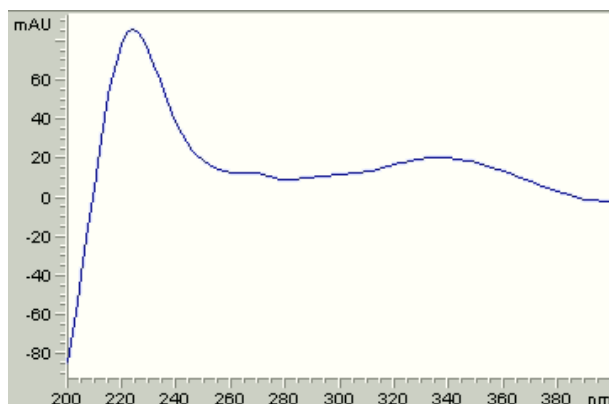

Figure S26. UV spectrum of compound **25**  
(quantified using **quercetin calibration**)

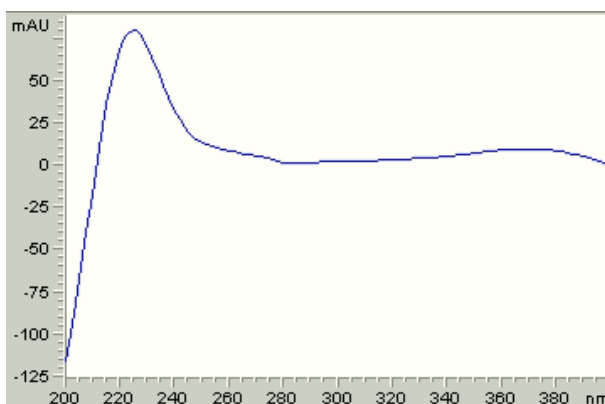

Figure S27. UV spectrum of compound **26**  
(identified as **quercetin** using a standard compound)

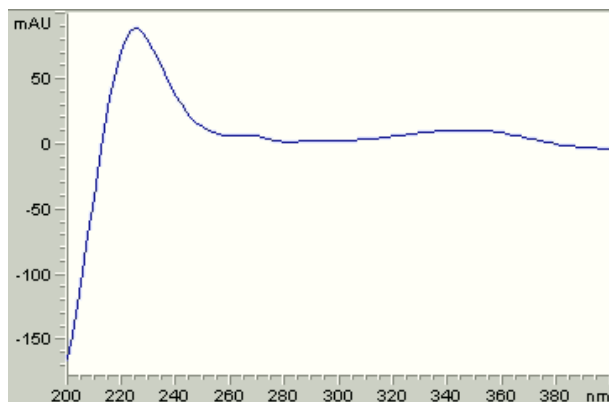

Figure S28. UV spectrum of compound **27**  
(quantified using **quercetin calibration**)

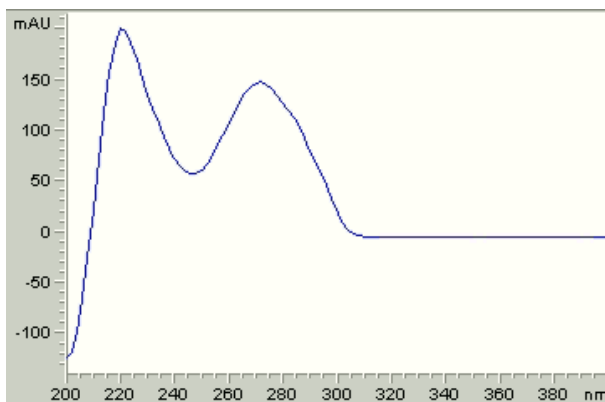

Figure S29. UV spectrum of compound **28**  
(internal standard **bicalutamide**)
